# Supplementary material
Source: PubMed Central journal article supplement (PMC8529519)
Supplement: jamasurg-e215246-s001.pdf [file jamasurg-e215246-s001.pdf]

## Supplemental Online Content

Heiderscheit EA, Schlick CJR, Ellis RJ, et al. Experiences of LGBTQ+ residents in US general surgery training programs. *JAMA Surg*. Published online October 20, 2021. doi:10.1001/jamasurg.2021.5246

**eAppendix.** Relevant items from 2019 ABSITE survey

**eTable.** Sources of mistreatment for individual behaviors

This supplementary material has been provided by the authors to give readers additional information about their work.

**eAppendix.** Relevant items from 2019 ABSITE survey

(Paper format shown here, but the survey is delivered on an electronic platform)

Survey Preamble

Please complete the following survey to share your thoughts about your residency experience. The information will be used to inform future research and policy decisions to improve the learning environment and culture of residency. It is estimated that it will take approximately 5 to 8 minutes to complete the questions. **The survey responses are never associated with your personal identity. All data are de-identified for analyses and reporting. Your program will not have access to your individual responses.**

**1. Are you currently enrolled in a clinically active year of your residency? This is defined as the PGY1-5 years that count toward your board eligibility.**

|                                                                                                                                                                 |
|-----------------------------------------------------------------------------------------------------------------------------------------------------------------|
| Yes                                                                                                                                                             |
| No, I am currently working on research (full time), obtaining an additional degree (full time), or otherwise taking a break from my clinical years of training. |

**2. The following describes me: (most applicable)**

|                                                   |                          |
|---------------------------------------------------|--------------------------|
| a. Married                                        | <input type="checkbox"/> |
| b. Not married but in a relationship              | <input type="checkbox"/> |
| c. Not married and not in a relationship (single) | <input type="checkbox"/> |
| d. Divorced/Separated                             | <input type="checkbox"/> |
| e. Widowed                                        | <input type="checkbox"/> |

**3. As of July 2018, how many children (under 18) do you have?**

|       |                          |
|-------|--------------------------|
| a. 0  | <input type="checkbox"/> |
| b. 1  | <input type="checkbox"/> |
| c. 2  | <input type="checkbox"/> |
| d. 3  | <input type="checkbox"/> |
| e. 4  | <input type="checkbox"/> |
| f. 5+ | <input type="checkbox"/> |

**4. During this academic year (July 2018 to present), were you or your partner pregnant/adopting/expecting a child?**

|                          |                          |
|--------------------------|--------------------------|
| Yes                      | No                       |
| <input type="checkbox"/> | <input type="checkbox"/> |

**5. I identify my race as: (select all that apply)**

|                                              |                          |
|----------------------------------------------|--------------------------|
| a. American Indian or Alaska Native          | <input type="checkbox"/> |
| b. Asian                                     | <input type="checkbox"/> |
| c. Black or African American                 | <input type="checkbox"/> |
| d. Native Hawaiian or Other Pacific Islander | <input type="checkbox"/> |
| e. White                                     | <input type="checkbox"/> |
| f. Other                                     | <input type="checkbox"/> |
| g. Prefer not to say                         | <input type="checkbox"/> |

**6. I identify my ethnicity as:**

|                           |                          |
|---------------------------|--------------------------|
| a. Hispanic or Latino     | <input type="checkbox"/> |
| b. Not Hispanic or Latino | <input type="checkbox"/> |
| c. Prefer not to say      | <input type="checkbox"/> |

**7. I identify my gender/sexual orientation as (select all that apply):**

|                          |                          |
|--------------------------|--------------------------|
| a. Straight              | <input type="checkbox"/> |
| b. Gay or lesbian        | <input type="checkbox"/> |
| c. Bisexual              | <input type="checkbox"/> |
| d. Other orientation     | <input type="checkbox"/> |
| e. Transgender           | <input type="checkbox"/> |
| f. Other gender identity | <input type="checkbox"/> |
| g. Prefer not to answer  | <input type="checkbox"/> |

| 9. Please indicate the extent to which you agree with the following statements:                 |                          |                          |                          |                          |                          |
|-------------------------------------------------------------------------------------------------|--------------------------|--------------------------|--------------------------|--------------------------|--------------------------|
| Item                                                                                            | Strongly disagree        | Disagree                 | Neutral                  | Agree                    | Strongly agree           |
| a. My work is appreciated by my co-residents.                                                   | <input type="checkbox"/> |
| b. My work is appreciated by my attendings.                                                     | <input type="checkbox"/> |
| c. The residents in my program cooperate with one another.                                      | <input type="checkbox"/> |
| d. Favoritism determines how decisions are made during residency.                               | <input type="checkbox"/> |
| e. I have a mentor within the department of surgery who genuinely cares about me and my career. | <input type="checkbox"/> |
| f. I consider my co-residents to be among my closest friends.                                   | <input type="checkbox"/> |

| 10. Thinking back on this academic year (July 2018 to present), how satisfied were <u>you</u> with the following? |                          |                          |                          |                          |                          |
|-------------------------------------------------------------------------------------------------------------------|--------------------------|--------------------------|--------------------------|--------------------------|--------------------------|
| Item                                                                                                              | Very Dissatisfied        | Dissatisfied             | Neutral                  | Satisfied                | Very Satisfied           |
| a. Your decision to become a surgeon.                                                                             | <input type="checkbox"/> |

| 11. Using the scale below, indicate the frequency with which you've experienced the following in your general surgery residency during this academic year (July 2018 to present). |                          |                          |                          |                          |                          |
|-----------------------------------------------------------------------------------------------------------------------------------------------------------------------------------|--------------------------|--------------------------|--------------------------|--------------------------|--------------------------|
| Item                                                                                                                                                                              | Never                    | Now and then             | Monthly                  | Weekly                   | Daily                    |
| a. Someone withholding information which affects your performance                                                                                                                 | <input type="checkbox"/> |
| b. Spreading of gossip and rumors about you                                                                                                                                       | <input type="checkbox"/> |
| c. Being ignored or excluded                                                                                                                                                      | <input type="checkbox"/> |
| d. Having insulting or offensive remarks made about your person, attitudes, or your private life                                                                                  | <input type="checkbox"/> |
| e. Being shouted at or being the target of spontaneous anger                                                                                                                      | <input type="checkbox"/> |
| f. Repeated reminders of your errors or mistakes                                                                                                                                  | <input type="checkbox"/> |
| g. Being ignored or facing a hostile reaction when you approach                                                                                                                   | <input type="checkbox"/> |
| h. Persistent criticism of your work and effort                                                                                                                                   | <input type="checkbox"/> |
| i. Practical jokes carried about by people you don't get along with                                                                                                               | <input type="checkbox"/> |
| j. Being cursed or sworn at                                                                                                                                                       | <input type="checkbox"/> |

| 12. (only populate rows with #11 answers > "Never" to "a-j") During this academic year (July 2018 to present), from whom did you experience these behaviors noted in the prior question (spreading gossip/rumors about you, being shouted at, repeated reminders of your errors or mistakes, being cursed or sworn at, etc.)? (Select all that apply) |                          |                          |                                              |                                                                           |
|-------------------------------------------------------------------------------------------------------------------------------------------------------------------------------------------------------------------------------------------------------------------------------------------------------------------------------------------------------|--------------------------|--------------------------|----------------------------------------------|---------------------------------------------------------------------------|
| Patient(s) (includes patient's family members)                                                                                                                                                                                                                                                                                                        | Attending(s)             | Administrator(s)         | Colleagues (other resident(s) and fellow(s)) | Nurse(s)/ Support staff (e.g., radiology technicians, IT personnel, etc.) |
| <input type="checkbox"/>                                                                                                                                                                                                                                                                                                                              | <input type="checkbox"/> | <input type="checkbox"/> | <input type="checkbox"/>                     | <input type="checkbox"/>                                                  |

**13. Please indicate the extent to which you agree with the following statement:**

| Item                                                                                                    | Strongly disagree        | Disagree                 | Neutral                  | Agree                    | Strongly agree           |
|---------------------------------------------------------------------------------------------------------|--------------------------|--------------------------|--------------------------|--------------------------|--------------------------|
| I have considered leaving my residency program during the current academic year (July 2018 to present). | <input type="checkbox"/> |

**14. During the past 12 months:**

|                                                | No                       | Yes                      |
|------------------------------------------------|--------------------------|--------------------------|
| Have you had thoughts of taking your own life? | <input type="checkbox"/> | <input type="checkbox"/> |

**14a. (only if answered “Yes” to “14”)**

Suicidal ideation should be taken seriously, and we urge you to seek medical attention. You can start by reaching out to your program director for help or calling the toll-free National Suicide Prevention Lifeline (1-800-273-8255), available 24 hours a day, 7 days a week. The service is available to anyone. All calls are confidential.  
<http://www.suicidepreventionlifeline.org>

| <b>16. Using the scale below, indicate the frequency with which you've experienced the following in your general surgery residency during this academic year (July 2018 to present).</b> |                          |                           |                             |                            |                          |                           |                          |
|------------------------------------------------------------------------------------------------------------------------------------------------------------------------------------------|--------------------------|---------------------------|-----------------------------|----------------------------|--------------------------|---------------------------|--------------------------|
| <b>Item</b>                                                                                                                                                                              | <b>Never</b>             | <b>A few times a year</b> | <b>Once a month or less</b> | <b>A few times a month</b> | <b>Once a week</b>       | <b>A few times a week</b> | <b>Every Day</b>         |
| a. Crude/sexually demeaning or explicit remarks, stories, or jokes                                                                                                                       | <input type="checkbox"/> | <input type="checkbox"/>  | <input type="checkbox"/>    | <input type="checkbox"/>   | <input type="checkbox"/> | <input type="checkbox"/>  | <input type="checkbox"/> |
| b. Unwanted sexual imagery or materials sent or shown to you                                                                                                                             | <input type="checkbox"/> | <input type="checkbox"/>  | <input type="checkbox"/>    | <input type="checkbox"/>   | <input type="checkbox"/> | <input type="checkbox"/>  | <input type="checkbox"/> |
| c. Unwanted verbal sexual attention (e.g., comments, flirtations, sexual advances)                                                                                                       | <input type="checkbox"/> | <input type="checkbox"/>  | <input type="checkbox"/>    | <input type="checkbox"/>   | <input type="checkbox"/> | <input type="checkbox"/>  | <input type="checkbox"/> |
| d. Offensive body language (e.g., leering, standing too close)                                                                                                                           | <input type="checkbox"/> | <input type="checkbox"/>  | <input type="checkbox"/>    | <input type="checkbox"/>   | <input type="checkbox"/> | <input type="checkbox"/>  | <input type="checkbox"/> |
| e. Unwanted physical sexual attention (e.g., inappropriate or uncomfortable touching; attempts to touch, fondle or kiss)                                                                 | <input type="checkbox"/> | <input type="checkbox"/>  | <input type="checkbox"/>    | <input type="checkbox"/>   | <input type="checkbox"/> | <input type="checkbox"/>  | <input type="checkbox"/> |
| f. Sexual coercion (e.g., bribed or threatened to engage in sexual behavior; suggestion of better treatment if sexually cooperative)                                                     | <input type="checkbox"/> | <input type="checkbox"/>  | <input type="checkbox"/>    | <input type="checkbox"/>   | <input type="checkbox"/> | <input type="checkbox"/>  | <input type="checkbox"/> |

| 17. Using the scale below, indicate from whom you've experienced the following in your general surgery residency during this academic year (July 2018 to present). (Select all that apply) |                          |                                                |                          |                          |                                              |                                                                           |
|--------------------------------------------------------------------------------------------------------------------------------------------------------------------------------------------|--------------------------|------------------------------------------------|--------------------------|--------------------------|----------------------------------------------|---------------------------------------------------------------------------|
| Item                                                                                                                                                                                       | Never Experienced It     | Patient(s) (includes patient's family members) | Attending(s)             | Administrator(s)         | Colleagues (other resident(s) and fellow(s)) | Nurse(s)/ Support staff (e.g., radiology technicians, IT personnel, etc.) |
| a. Crude/sexually demeaning or explicit remarks                                                                                                                                            | <input type="checkbox"/> | <input type="checkbox"/>                       | <input type="checkbox"/> | <input type="checkbox"/> | <input type="checkbox"/>                     | <input type="checkbox"/>                                                  |
| b. Unwanted sexual imagery sent or shown to you                                                                                                                                            | <input type="checkbox"/> | <input type="checkbox"/>                       | <input type="checkbox"/> | <input type="checkbox"/> | <input type="checkbox"/>                     | <input type="checkbox"/>                                                  |
| c. Unwanted verbal sexual attention (e.g., flirtations, sexual advances)                                                                                                                   | <input type="checkbox"/> | <input type="checkbox"/>                       | <input type="checkbox"/> | <input type="checkbox"/> | <input type="checkbox"/>                     | <input type="checkbox"/>                                                  |
| d. Offensive body language (e.g., leering, standing too close)                                                                                                                             | <input type="checkbox"/> | <input type="checkbox"/>                       | <input type="checkbox"/> | <input type="checkbox"/> | <input type="checkbox"/>                     | <input type="checkbox"/>                                                  |
| e. Unwanted physical sexual attention (e.g., inappropriate touching)                                                                                                                       | <input type="checkbox"/> | <input type="checkbox"/>                       | <input type="checkbox"/> | <input type="checkbox"/> | <input type="checkbox"/>                     | <input type="checkbox"/>                                                  |
| f. Sexual coercion (e.g., bribed or threatened to engage in sexual behavior; suggestion of better treatment if sexually cooperative)                                                       | <input type="checkbox"/> | <input type="checkbox"/>                       | <input type="checkbox"/> | <input type="checkbox"/> | <input type="checkbox"/>                     | <input type="checkbox"/>                                                  |

**18. Using the scale below, indicate the frequency with which you've experienced the following based on your GENDER/GENDER IDENTITY/SEXUAL ORIENTATION in your general surgery residency during this academic year (July 2018 to present). These questions are NOT related to race/ethnicity/religion.**

| Item                                                                                                                                                                         | Never                    | A few times a year       | Once a month or less     | A few times a month      | Once a week              | A few times a week       | Every Day                |
|------------------------------------------------------------------------------------------------------------------------------------------------------------------------------|--------------------------|--------------------------|--------------------------|--------------------------|--------------------------|--------------------------|--------------------------|
| a. Different standards of evaluation (e.g., lowered expectations, need to work harder to achieve the same success as others, unfair punishment, less respect for my opinion) | <input type="checkbox"/> |
| b. Denied opportunities (e.g., OR cases, attendance at conferences, career options, opportunities for advancements, mentorship)                                              | <input type="checkbox"/> |
| c. Mistaken for a non-physician based on your <u>gender/gender identity/sexual orientation</u>                                                                               | <input type="checkbox"/> |
| d. Slurs and/or hurtful/humiliating/negative/uncomfortable comments even when purported as jokes                                                                             | <input type="checkbox"/> |
| e. Socially isolated (e.g., excluded from social events, malicious gossip)                                                                                                   | <input type="checkbox"/> |
| f. Was advised against having children during residency                                                                                                                      | <input type="checkbox"/> |
| g. Felt like my/my partner's pregnancy or our childcare needs led to negative reactions from my coworkers/program                                                            | <input type="checkbox"/> |



**19. Using the scale below, indicate from whom you've experienced the following based on your GENDER/GENDER IDENTITY/SEXUAL ORIENTATION in your general surgery residency during this academic year (July 2018 to present). These questions are NOT related to race/ethnicity/religion. (Select all that apply)**

| Item                                                                                                                                                                         | Never Experienced It     | Patient(s) (includes patient's family members) | Attending (s)            | Administrator (s)        | Colleagues (other resident(s) and fellow(s)) | Nurse(s)/ Support staff (e.g., radiology technicians, IT personnel, etc.) |
|------------------------------------------------------------------------------------------------------------------------------------------------------------------------------|--------------------------|------------------------------------------------|--------------------------|--------------------------|----------------------------------------------|---------------------------------------------------------------------------|
| a. Different standards of evaluation (e.g., lowered expectations, need to work harder to achieve the same success as others, unfair punishment, less respect for my opinion) | <input type="checkbox"/> | <input type="checkbox"/>                       | <input type="checkbox"/> | <input type="checkbox"/> | <input type="checkbox"/>                     | <input type="checkbox"/>                                                  |
| b. Denied opportunities (e.g., OR cases, attendance at conferences, career options, opportunities for advancements, mentorship)                                              | <input type="checkbox"/> | <input type="checkbox"/>                       | <input type="checkbox"/> | <input type="checkbox"/> | <input type="checkbox"/>                     | <input type="checkbox"/>                                                  |
| c. Mistaken for a non-physician based on your <u>gender/gender identity/sexual orientation</u>                                                                               | <input type="checkbox"/> | <input type="checkbox"/>                       | <input type="checkbox"/> | <input type="checkbox"/> | <input type="checkbox"/>                     | <input type="checkbox"/>                                                  |
| d. Slurs and/or hurtful/humiliating/negative/uncomfortable comments even when purported as jokes                                                                             | <input type="checkbox"/> | <input type="checkbox"/>                       | <input type="checkbox"/> | <input type="checkbox"/> | <input type="checkbox"/>                     | <input type="checkbox"/>                                                  |
| e. Socially isolated (e.g., excluded from social events, malicious gossip)                                                                                                   | <input type="checkbox"/> | <input type="checkbox"/>                       | <input type="checkbox"/> | <input type="checkbox"/> | <input type="checkbox"/>                     | <input type="checkbox"/>                                                  |
| f. Was advised against having children during residency                                                                                                                      | <input type="checkbox"/> | <input type="checkbox"/>                       | <input type="checkbox"/> | <input type="checkbox"/> | <input type="checkbox"/>                     | <input type="checkbox"/>                                                  |
| g. Felt like my pregnancy/childcare needs led to negative reactions from my coworkers                                                                                        | <input type="checkbox"/> | <input type="checkbox"/>                       | <input type="checkbox"/> | <input type="checkbox"/> | <input type="checkbox"/>                     | <input type="checkbox"/>                                                  |

**eTable. Sources of mistreatment for individual behaviors**

| Sources of Mistreatment for LGBTQ+ and Non-LGBTQ+ Residents         |                |                       |             |                 |                 |                             |                 |                       |                 |                 |                 |                             |
|---------------------------------------------------------------------|----------------|-----------------------|-------------|-----------------|-----------------|-----------------------------|-----------------|-----------------------|-----------------|-----------------|-----------------|-----------------------------|
|                                                                     | Non-LGBTQ+     |                       |             |                 |                 |                             | LGBTQ+          |                       |                 |                 |                 |                             |
|                                                                     | n (%)          |                       |             |                 |                 |                             | n (%)           |                       |                 |                 |                 |                             |
|                                                                     | Not Identified | Patients/<br>Families | Attendings  | Admin*          | Colleagues      | Nurses/<br>Support<br>Staff | Not Identified  | Patients/<br>Families | Attendings      | Admin*          | Colleagues      | Nurses/<br>Support<br>Staff |
| Discrimination based upon Gender/Gender Identity/Sexual Orientation |                |                       |             |                 |                 |                             |                 |                       |                 |                 |                 |                             |
| Different Standards of Evaluation                                   | 196 (16.3)     | 84 (7.0)              | 674 (56.2)  | 18 (1.5)        | 92 (7.7)        | 135 (11.3)                  | 12 (17.9)       | 5 (7.5)               | 40 (59.7)       | <i>Withheld</i> | 5 (7.5)         | <i>Withheld</i>             |
| Denied Opportunities                                                | 148 (23.5)     | 10 (1.6)              | 345 (54.8)  | 21 (3.3)        | 94 (14.9)       | 12 (1.9)                    | <i>Withheld</i> | <i>Withheld</i>       | 23 (69.7)       | <i>Withheld</i> | <i>Withheld</i> | <i>Withheld</i>             |
| Mistaken for a Non-Physician                                        | 127 (7.3)      | 1391 (79.4)           | 19 (1.1)    | <i>Withheld</i> | 7 (0.4)         | 204 (11.7)                  | 8 (6.2)         | 93 (71.5)             | <i>Withheld</i> | <i>Withheld</i> | <i>Withheld</i> | 22 (16.9)                   |
| Slurs or Negative Comments                                          | 241 (38.6)     | 110 (17.6)            | 112 (17.9)  | <i>Withheld</i> | 117 (18.7)      | 41 (6.6)                    | 23 (29.9)       | 9 (11.7)              | 19 (24.7)       | <i>Withheld</i> | 19 (24.7)       | 7 (9.1)                     |
| Socially Isolated                                                   | 118 (28.7)     | 5 (1.2)               | 57 (13.9)   | 6 (1.5)         | 213 (51.8)      | 12 (2.9)                    | 10 (32.3)       | <i>Withheld</i>       | <i>Withheld</i> | <i>Withheld</i> | 15 (48.4)       | <i>Withheld</i>             |
| Advised not to have Children                                        | 121 (16.3)     | 17 (2.3)              | 357 (48.0)  | 27 (3.6)        | 190 (25.5)      | 32 (4.3)                    | <i>Withheld</i> | <i>Withheld</i>       | 21 (53.8)       | <i>Withheld</i> | 9 (23.1)        | <i>Withheld</i>             |
| Negative Reactions to Pregnancy/Childcare Needs                     | 24 (11.0)      | <i>Withheld</i>       | 69 (31.5)   | 11 (5.0)        | 111 (50.7)      | <i>Withheld</i>             | <i>Withheld</i> | <i>Withheld</i>       | <i>Withheld</i> | <i>Withheld</i> | <i>Withheld</i> | <i>Withheld</i>             |
| Sexual Harassment                                                   |                |                       |             |                 |                 |                             |                 |                       |                 |                 |                 |                             |
| Crude, Demeaning, or Explicit Comments                              | 252 (18.3)     | 285 (20.7)            | 294 (21.3)  | <i>Withheld</i> | 402 (29.2)      | 142 (10.3)                  | 13 (11.1)       | 25 (21.4)             | 41 (35.0)       | <i>Withheld</i> | 25 (21.4)       | 12 (10.3)                   |
| Unwanted Sexual Imagery                                             | 88 (39.8)      | 18 (8.1)              | 20 (9.0)    | <i>Withheld</i> | 73 (33.0)       | 21 (9.5)                    | 9 (37.5)        | <i>Withheld</i>       | 5 (20.8)        | <i>Withheld</i> | 7 (29.2)        | <i>Withheld</i>             |
| Unwanted Verbal Sexual Attention                                    | 123 (18.4)     | 280 (41.9)            | 68 (10.2)   | 6 (0.9)         | 48 (7.2)        | 144 (21.5)                  | 10 (21.7)       | 15 (32.6)             | 7 (15.2)        | <i>Withheld</i> | 6 (13.0)        | 8 (17.4)                    |
| Offensive Body Language                                             | 146 (27.2)     | 124 (23.1)            | 114 (21.3)  | <i>Withheld</i> | 58 (10.8)       | 93 (17.4)                   | 11 (23.9)       | 10 (21.7)             | 14 (30.4)       | <i>Withheld</i> | 7 (15.2)        | <i>Withheld</i>             |
| Unwanted Physical Sexual Attention                                  | 72 (33.2)      | 37 (17.1)             | 35 (16.1)   | <i>Withheld</i> | 22 (10.1)       | 50 (23.0)                   | 8 (40.0)        | <i>Withheld</i>       | 5 (25.0)        | <i>Withheld</i> | <i>Withheld</i> | <i>Withheld</i>             |
| Sexual Coercion                                                     | 39 (66.1)      | 7 (11.9)              | 6 (10.2)    | <i>Withheld</i> | <i>Withheld</i> | <i>Withheld</i>             | <i>Withheld</i> | <i>Withheld</i>       | <i>Withheld</i> | <i>Withheld</i> | <i>Withheld</i> | <i>Withheld</i>             |
| Bullying                                                            |                |                       |             |                 |                 |                             |                 |                       |                 |                 |                 |                             |
| Someone Withholding Information                                     | 400 (23.0)     | 210 (12.1)            | 444 (25.5)  | 55 (3.2)        | 351 (20.2)      | 281 (16.1)                  | 18 (18.0)       | 10 (10.0)             | 30 (30.0)       | <i>Withheld</i> | 24 (24.0)       | 14 (14.0)                   |
| Spreading Gossip/Rumors                                             | 484 (27.1)     | 15 (0.8)              | 236 (13.2)  | 19 (1.1)        | 819 (45.8)      | 216 (12.1)                  | 22 (21.0)       | <i>Withheld</i>       | 9 (8.6)         | <i>Withheld</i> | 57 (54.3)       | 14 (13.3)                   |
| Being Ignored/Excluded                                              | 483 (28.3)     | 32 (1.9)              | 445 (26.0)  | 36 (2.1)        | 610 (35.7)      | 103 (6.0)                   | 17 (18.1)       | <i>Withheld</i>       | 30 (31.9)       | <i>Withheld</i> | 40 (42.6)       | 5 (5.3)                     |
| Offensive or Insulting Remarks                                      | 365 (28.6)     | 71 (5.6)              | 368 (28.8)  | 7 (0.5)         | 370 (29.0)      | 95 (7.4)                    | 13 (18.8)       | <i>Withheld</i>       | 22 (31.9)       | <i>Withheld</i> | 25 (36.2)       | 7 (10.1)                    |
| Being Shouted At                                                    | 447 (20.7)     | 231 (10.7)            | 1127 (52.2) | 12 (0.6)        | 270 (12.5)      | 72 (3.3)                    | 22 (16.7)       | 11 (8.3)              | 78 (59.1)       | <i>Withheld</i> | 17 (12.9)       | <i>Withheld</i>             |
| Being Reminded of Errors or Mistakes                                | 659 (28.3)     | 25 (1.1)              | 1076 (46.3) | 28 (1.2)        | 500 (21.5)      | 38 (1.6)                    | 28 (20.6)       | <i>Withheld</i>       | 75 (55.1)       | <i>Withheld</i> | 31 (22.8)       | <i>Withheld</i>             |
| Being Ignored/Hostile Reactions                                     | 390 (29.5)     | 46 (3.5)              | 505 (38.2)  | 22 (1.7)        | 248 (18.8)      | 111 (8.4)                   | 20 (24.4)       | <i>Withheld</i>       | 35 (42.7)       | <i>Withheld</i> | 15 (18.3)       | 12 (14.6)                   |
| Persistent Criticism of your Work/Effort                            | 493 (29.8)     | 22 (1.3)              | 758 (45.8)  | 26 (1.6)        | 319 (19.3)      | 37 (2.2)                    | 23 (21.5)       | <i>Withheld</i>       | 56 (52.3)       | <i>Withheld</i> | 24 (22.4)       | <i>Withheld</i>             |
| Practical Jokes by People you do not Get Along With                 | 228 (46.8)     | 5 (1.0)               | 39 (8.0)    | <i>Withheld</i> | 167 (34.3)      | 45 (9.2)                    | 6 (22.2)        | <i>Withheld</i>       | 6 (22.2)        | <i>Withheld</i> | 11 (40.7)       | <i>Withheld</i>             |
| Being Cursed or Sworn At                                            | 266 (21.2)     | 148 (11.8)            | 656 (52.3)  | 6 (0.5)         | 159 (12.7)      | 20 (1.6)                    | 9 (13.4)        | 9 (13.4)              | 43 (64.2)       | <i>Withheld</i> | 5 (7.5)         | <i>Withheld</i>             |

\*Admin=administrators
